# Supplementary material
Source: Research Square preprint supplement (doi:10.21203/rs.3.rs-8707569/v1)
Supplement: Supplementary file 1 [file cb9ba60be936d84b3e1d8e73.docx]

**SEMI-STRUCTURED INTERVIEW FORM**

1. How does caring for someone who has had a stroke make you feel?

2. How does caring for someone who has had a stroke affect your life and needs?

a) How does it affect your relationships with other family members?

b) How does it affect your roles (mother, spouse, sibling, father, etc.)?

3. How does having someone dependent on you for care make you feel?

4. What are your concerns about your patient's future condition?

5. What difficulties do you experience while caring for your patient?
